# Supplementary material for: Theoretical studies on oxidation-switchable second-order nonlinear optical responses of Metallosalen-Keggin polyoxometalate derivatives
Source: Royal Society of Chemistry journal article supplement (doi:10.1039/c6ra00146g), 2016-01-01
Supplement: c6ra00146g1.pdf [file c6ra00146g1.pdf]

## Electronic supplementary information

### Theoretical Studies on Oxidation-Switchable Second-Order Nonlinear Optical Responses of Metallosalen-Keggin Polyoxometalate Derivatives

Teng-Ying Ma,<sup>ab</sup> Ting Zhang,<sup>b</sup> Bo Zhu,<sup>b</sup> Li-Kai Yan<sup>\*b</sup> and Zhong-Min Su<sup>\*ab</sup>

E-mail: [yanlk924@nenu.edu.cn](mailto:yanlk924@nenu.edu.cn); [zmsu@nenu.edu.cn](mailto:zmsu@nenu.edu.cn)

#### Content

1. The highest occupied molecular orbital (HOMO) of **Pd-salen-POM**, **Ni-salen-POM** and **Co-salen-POM**.
2. Molecular orbitals of **Ni-salen-POM** and **oxo-Ni-salen-POM** involved in the crucial excited states.
3. Molecular orbitals of **Co-salen-POM** and **oxo-Co-salen-POM** involved in the crucial excited states.
4. The relative energies (eV) of the **Pd-salen-POM**, **oxo-Pd-salen-POM**, **Ni-salen-POM**, **oxo-Ni-salen-POM**, **Co-salen-POM** and **oxo-Co-salen-POM** compounds for several spin configurations have been calculated by different functionals.
5. The transition energies  $\Delta E$  (eV), maximum absorption wavelengths  $\lambda_{\text{max}}$  (nm), oscillator strengths  $f$ , and major contribution of all compounds obtained by PBE0 functional.



**Table S1.** The relative energies  $\Delta E$  (eV) of the **Pd-salen-POM**, **oxo-Pd-salen-POM**, **Ni-salen-POM**, **oxo-Ni-salen-POM**, **Co-salen-POM** and **oxo-Co-salen-POM** compounds for several spin configurations have been calculated by different functionals.

| Compounds               | spin configuration | B3LYP (eV) | M06-2X (eV) | CAM-B3LYP (eV) | LC-BLYP (eV) | PBE0 (eV) |
|-------------------------|--------------------|------------|-------------|----------------|--------------|-----------|
| <b>Pd-salen-POM</b>     | 1                  | 0          | 0           | 0              | 0            | 0         |
|                         | 3                  | 1.980      | 2.069       | 2.141          | 2.070        | 2.102     |
| <b>oxo-Pd-salen-POM</b> | 2                  | 0          | 0           | 0              | 0            | 0         |
|                         | 4                  | 1.628      | 1.384       | 0.788          | 1.470        | 1.551     |
| <b>Ni-salen-POM</b>     | 1                  | 0          | 0           | 0              | 0            | 0         |
|                         | 3                  | 0.801      | 3.089       | 2.649          | 0.211        | 0.879     |
| <b>oxo-Ni-salen-POM</b> | 2                  | 0          | 0           | 0              | 0            | 0         |
|                         | 4                  | 0.235      | 0.277       | 0.390          | 0.396        | 0.032     |
| <b>Co-salen-POM</b>     | 2                  | 0.190      | 0.301       | 0.270          | 0.381        | 0.096     |
|                         | 4                  | 0          | 0           | 0              | 0            | 0         |
| <b>oxo-Co-salen-POM</b> | 1                  | 0.886      | 1.185       | 1.372          | 1.878        | 1.300     |
|                         | 3                  | 0          | 0           | 0              | 0            | 0         |
|                         | 5                  | 0.246      | 0.143       | 0.122          | 0.513        | 0.117     |

**Table S2.** The transition energies  $\Delta E$  (eV), maximum absorption wavelengths  $\lambda_{\max}$  (nm), oscillator strengths  $f$ , and major contribution of all compounds obtained by PBE0 functional.

| Compounds               | Excited state | $\Delta E$ (eV) | $\lambda_{\max}$ /nm | $f$   | Major contribution                                                                        |
|-------------------------|---------------|-----------------|----------------------|-------|-------------------------------------------------------------------------------------------|
| <b>Pd-salen-POM</b>     | S24           | 3.518           | 352.4                | 0.148 | H $\rightarrow$ L+21 (34%), H-1 $\rightarrow$ L+19 (31%)                                  |
|                         |               |                 | 382.0 <sup>[a]</sup> |       | H $\rightarrow$ L+7 (8%)                                                                  |
| <b>Ni-salen-POM</b>     | S33           | 3.641           | 340.6                | 0.200 | H-1 $\rightarrow$ L+19 (65%), H $\rightarrow$ L+23 (16%)                                  |
|                         | S32           | 3.618           | 342.7                | 0.037 | H-1 $\rightarrow$ L+13 (29%), H-1 $\rightarrow$ L+12 (18%)                                |
| <b>Co-salen-POM</b>     | S60           | 3.431           | 361.4                | 0.027 | $\beta$ H $\rightarrow$ $\beta$ L+24 (59%), $\beta$ H $\rightarrow$ $\beta$ L+11 (7%)     |
|                         |               |                 | 358.0 <sup>[a]</sup> |       | $\alpha$ H-1 $\rightarrow$ $\alpha$ L+18 (5%)                                             |
| <b>oxo-Pd-salen-POM</b> | S4            | 1.539           | 805.4                | 0.027 | $\beta$ H-1 $\rightarrow$ $\beta$ L (98%)                                                 |
|                         | S19           | 2.655           | 467.1                | 0.035 | $\beta$ H-38 $\rightarrow$ $\beta$ L (41%), $\alpha$ H-1 $\rightarrow$ $\alpha$ L+4 (12%) |
| <b>oxo-Ni-salen-POM</b> | S13           | 1.740           | 712.4                | 0.019 | $\beta$ H-19 $\rightarrow$ $\beta$ L (82%), $\beta$ H-17 $\rightarrow$ $\beta$ L (5%)     |
|                         | S15           | 2.010           | 616.8                | 0.049 | $\beta$ H-32 $\rightarrow$ $\beta$ L (82%), $\beta$ H-22 $\rightarrow$ $\beta$ L (6%)     |
| <b>oxo-Co-salen-POM</b> | S10           | 1.603           | 773.6                | 0.106 | $\beta$ H-18 $\rightarrow$ $\beta$ L (45%), $\beta$ H-9 $\rightarrow$ $\beta$ L (23%)     |
|                         |               |                 |                      |       | $\beta$ H $\rightarrow$ $\beta$ L (712%), $\beta$ H-2 $\rightarrow$ $\beta$ L (11%)       |

[a] The experimental data of maximum absorption wavelengths.
